# Supplementary material
Source: PubMed Central journal article supplement (PMC395902)

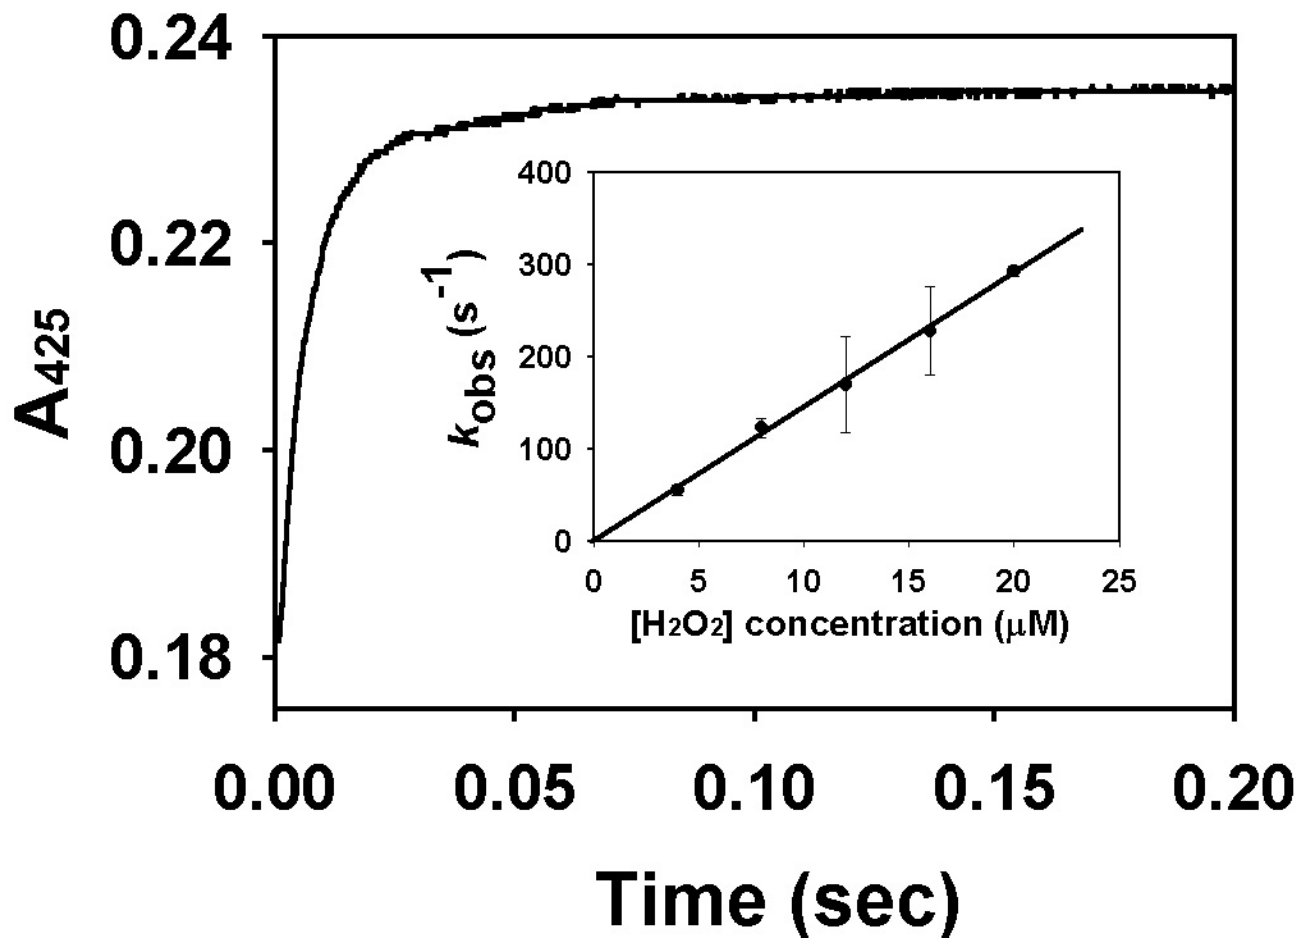

Supplement: pnas_101_16_5940__1.pdf [file pnas_101_16_5940__1.pdf]

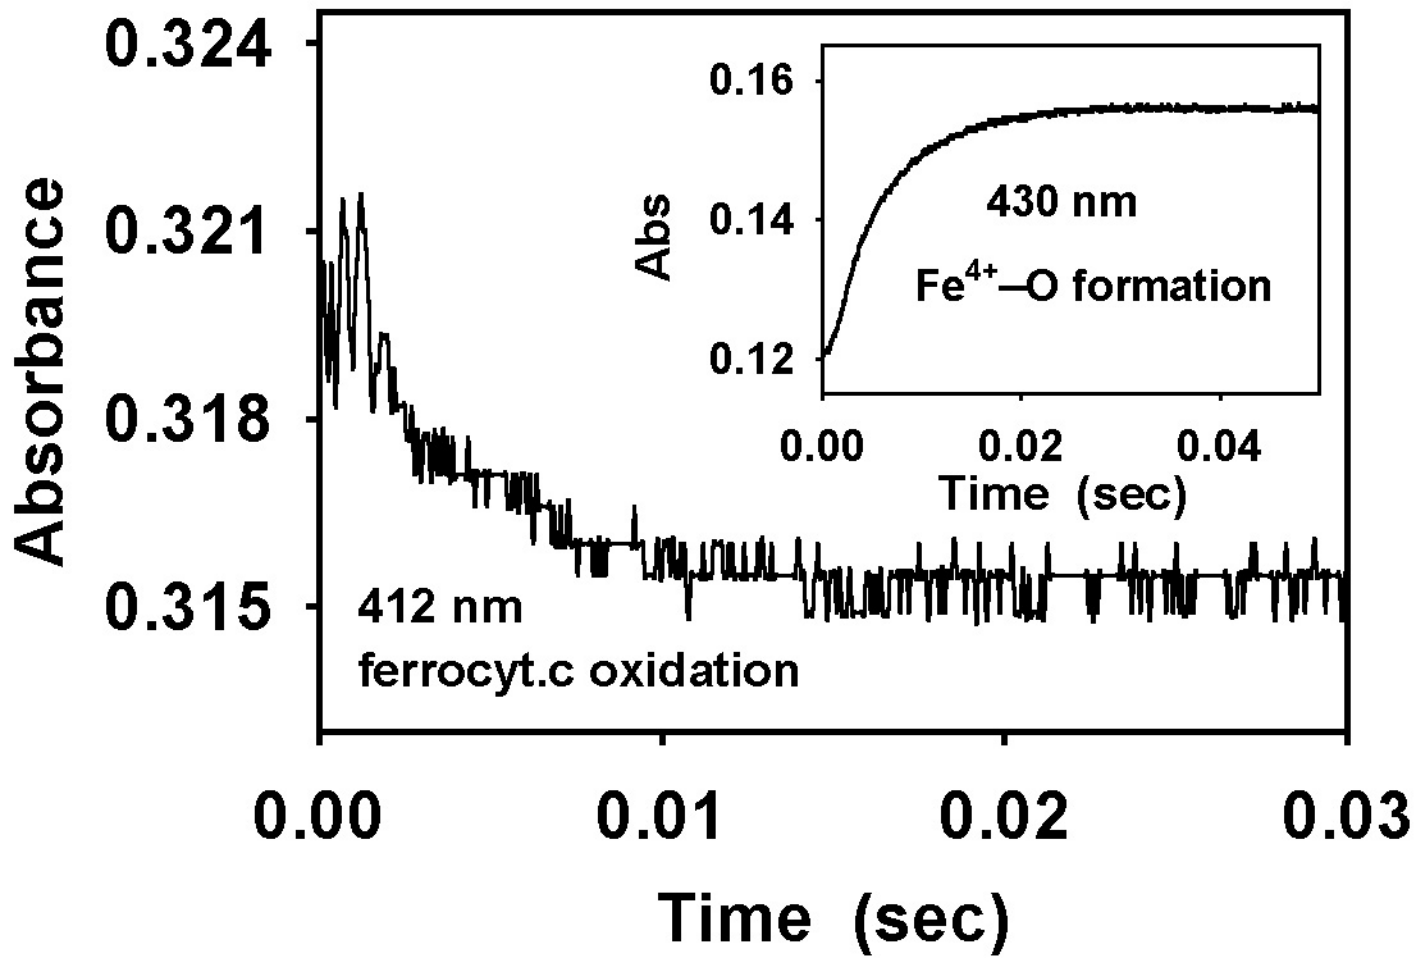

Supplement: pnas_101_16_5940__2.pdf [file pnas_101_16_5940__2.pdf]
